# Supplementary material for: Mitochondrial Structure and Function in the Metabolic Myopathy Accompanying Patients with Critical Limb Ischemia
Source: MDPI journal article supplement (doi:10.3390/cells9030570), 2020-02-28
Supplement: s1 [file s1]

## **SUPPLEMENTAL MATERIAL**

### **Mitochondrial structure and function in the metabolic myopathy accompanying patients with critical limb ischemia**

Thomas Groennebaek<sup>1</sup>, Tine Borum Billeskov<sup>2,6</sup>, Camilla Tvede Schytz<sup>1,3</sup>, Nichlas Riise Jespersen<sup>4</sup>, Hans Erik Bøtker<sup>4</sup>, Rikke Kathrine Jentoft Olsen<sup>5</sup>, Nikolaj Eldrup<sup>6</sup>, Joachim Nielsen<sup>3</sup>, Jean Farup<sup>2</sup>, Frank Vincenzo de Paoli<sup>2,6\*</sup>, Kristian Vissing<sup>1\*</sup>

<sup>1</sup>Department of Public Health, Aarhus University, Aarhus, Denmark

<sup>2</sup>Department of Biomedicine, Aarhus University, Aarhus, Denmark

<sup>3</sup>Department of Sports Science and Clinical Biomechanics, University of Southern Denmark, Odense, Denmark

<sup>4</sup>Department of Cardiology, Aarhus University Hospital, Aarhus, Denmark

<sup>5</sup>Research Unit for Molecular Medicine, Aarhus University Hospital, Aarhus, Denmark

<sup>6</sup>Department of Cardiothoracic and Vascular Surgery, Aarhus University Hospital, Aarhus, Denmark

## Supplemental figure

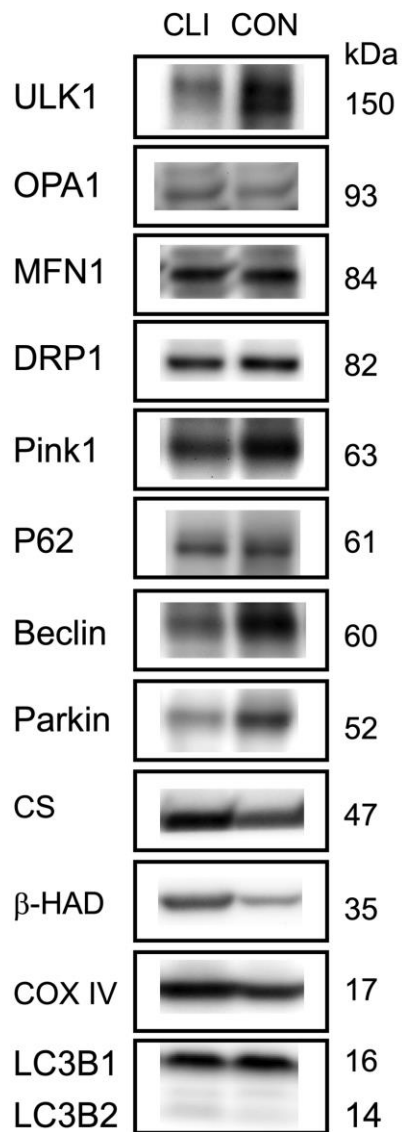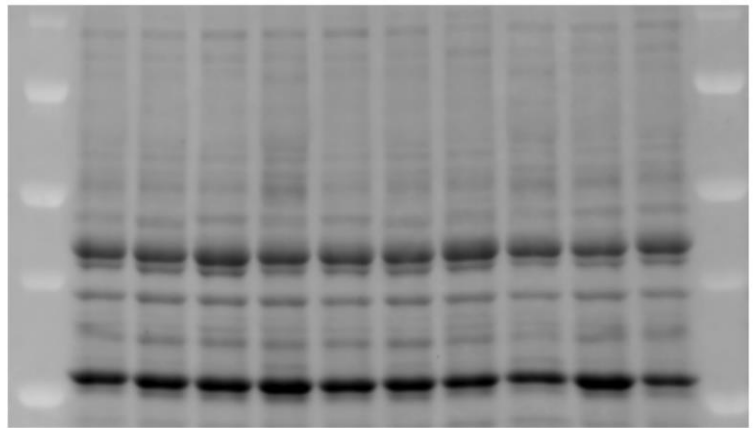

**Figure S1.** Representative immunoblots. Representative blots of individual proteins for one CLI patient and one CON patient(A). Representative stain free blot image of membrane used for normalization of total protein for five CLI patients and five CON patients (B).
